# Supplementary material for: Effect of Comprehensive Care Coordination on Medicaid Expenditures Compared With Usual Care Among Children and Youth With Chronic Disease: A Randomized Clinical Trial
Source: PubMed Central journal article supplement (PMC6784784; doi:10.1001/jamanetworkopen.2019.12604), 2019-10-04
Supplement: jamanetwopen-2-e1912604-s002.pdf [file jamanetwopen-2-e1912604-s002.pdf]

## Supplementary Online Content

Caskey R, Moran K, Touchette D, et al. Effect of comprehensive care coordination on Medicaid expenditures compared with usual care among children and youth with chronic disease: a randomized clinical trial. *JAMA Netw Open*. 2019;2(10):e1912604.  
doi:10.1001/jamanetworkopen.2019.12604

**eTable 1.** Codes Used to Identify Specific Chronic Diseases for CHECK Eligibility

**eTable 2.** Demographic Information of Outliers

**eTable 3.** Mean Expenditures, Before and After Intervention, of Outliers

**eFigure.** Mean Expenditures, Before and After Intervention, by 6-Month Increments, Showing Parallel Trends

This supplementary material has been provided by the authors to give readers additional information about their work.

**eTable 1. Codes Used to Identify Specific Chronic Diseases for CHECK Eligibility**

| <b>Diagnosis</b>                                                                                                                                                    | <b>ICD-9 code</b>                                                                                                                                                                                                           | <b>ICD-10 code</b>                                                                              |
|---------------------------------------------------------------------------------------------------------------------------------------------------------------------|-----------------------------------------------------------------------------------------------------------------------------------------------------------------------------------------------------------------------------|-------------------------------------------------------------------------------------------------|
| <b>Asthma</b>                                                                                                                                                       | 493.xx                                                                                                                                                                                                                      | J44.x, J45.xxx                                                                                  |
| <b>Diabetes</b>                                                                                                                                                     | 250.xx                                                                                                                                                                                                                      | E10.xxxx, E11.xxxx, E13.xxxx                                                                    |
| <b>Epilepsy</b>                                                                                                                                                     | 345.xx                                                                                                                                                                                                                      | G40.xxx                                                                                         |
| <b>Prematurity</b>                                                                                                                                                  | 765.00, 765.01, 765.02, 765.03,<br>765.04, 765.05, 765.06, 765.10,<br>765.11, 765.12, 765.13, 765.14,<br>765.15, 765.16, 765.20, 765.21,<br>765.22, 765.23, 765.24, 765.25,<br>765.26<br><br>768.5x, 768.6x, 768.7x, 768.9x | P07.0x, P07.1x, P07.2x, P07.30,<br>P07.31, P07.32, P07.33, P07.34,<br>P07.35<br><br>P84, P91.6x |
| <b>Sickle cell disease</b><br><br><i>*Required at least a 3:1 ratio of the number of claims with ICD code for sickle cell disease vs. sickle cell disease trait</i> | 282.41, 282.42, 282.6x, 289.52,<br>517.3x<br><br><u>Sickle cell disease trait:</u><br>282.5x                                                                                                                                | D57.0x, D57.1, D57.2xx,<br>D57.4xx, D57.8xx<br><br><u>Sickle cell disease trait:</u><br>D57.3   |

**eTable 2. Demographic Information of Outliers**

|                                 | Enrolled<br>(n = 5) |        | Usual Care<br>(n = 9) |        |
|---------------------------------|---------------------|--------|-----------------------|--------|
|                                 | n (%)               |        | n (%)                 |        |
| <b>Age at enrollment, years</b> |                     |        |                       |        |
| Mean (SD)                       | 7.2                 | (10.7) | 6.1                   | (9.5)  |
| Median (IQR)                    | 0.0                 | (12.0) | 0.0                   | (13.0) |
| Adults (≥18)                    | 1                   | (20.0) | 2                     | (22.2) |
| Adolescents (13-17)             | 0                   | (0.0)  | 1                     | (11.1) |
| Children (6-12)                 | 1                   | (20.0) | 0                     | (0.0)  |
| Young Children (1-5)            | 0                   | (0.0)  | 0                     | (0.0)  |
| Infants (<1) <sup>a</sup>       | 3                   | (60.0) | 6                     | (66.7) |
| <b>Gender</b>                   |                     |        |                       |        |
| Male                            | 3                   | (60.0) | 5                     | (55.6) |
| Female                          | 2                   | (40.0) | 4                     | (44.4) |
| <b>CHECK diagnoses</b>          |                     |        |                       |        |
| Asthma                          | 3                   | (60.0) | 5                     | (55.6) |
| Diabetes                        | 0                   | (0.0)  | 0                     | (0.0)  |
| Prematurity                     | 3                   | (60.0) | 6                     | (66.7) |
| Seizure disorder                | 2                   | (40.0) | 1                     | (11.1) |
| Sickle cell disease             | 0                   | (0.0)  | 0                     | (0.0)  |
| <i>No CHECK diagnosis</i>       | 0                   | (0.0)  | 0                     | (0.0)  |
| <b>Baseline risk tier</b>       |                     |        |                       |        |
| Low                             | 0                   | (0.0)  | 2                     | (22.2) |
| Medium                          | 3                   | (60.0) | 4                     | (44.4) |
| High                            | 2                   | (40.0) | 3                     | (33.3) |
| <b>CDPS risk score</b>          |                     |        |                       |        |
| Mean (SD)                       | 3.0                 | (2.1)  | 3.2                   | (2.2)  |
| Median (IQR)                    | 2.9                 | (2.0)  | 2.8                   | (3.0)  |

SD standard deviation; IQR interquartile range; CDPS Chronic Illness and Disability Payment System

<sup>a</sup> Excluded from program cohort due to lack of 12-month baseline period

**eTable 3. Mean Expenditures, Before and After Intervention, of Outliers**

|                            | Enrolled<br>(n = 5) |            | Usual Care<br>(n = 9) |             |
|----------------------------|---------------------|------------|-----------------------|-------------|
|                            | mean (SD)           |            | mean (SD)             |             |
| <b>Mean Expenditures</b>   |                     |            |                       |             |
| 12-month pre               | \$150,119           | (\$93,588) | \$238,767             | (\$238,083) |
| 12-month post              | \$23,811            | (\$50,303) | \$46,988              | (\$64,767)  |
| <b>Inpatient Cost, \$</b>  |                     |            |                       |             |
| 12-month pre               | \$144,539           | (\$96,580) | \$211,677             | (\$235,655) |
| 12-month post              | \$12,993            | (\$29,053) | \$30,179              | (\$59,388)  |
| <b>ED Cost, \$</b>         |                     |            |                       |             |
| 12-month pre               | \$342               | (\$587)    | \$423                 | (\$752)     |
| 12-month post              | \$955               | (\$1,647)  | \$384                 | (\$655)     |
| <b>Outpatient Cost, \$</b> |                     |            |                       |             |
| 12-month pre               | \$622               | (\$462)    | \$508                 | (\$520)     |
| 12-month post              | \$506               | (\$528)    | \$442                 | (\$727)     |
| <b>RX Cost, \$</b>         |                     |            |                       |             |
| 12-month pre               | \$2,861             | (\$4,202)  | \$6,225               | (\$4,913)   |
| 12-month post              | \$2,966             | (\$6,600)  | \$2,277               | (\$3,932)   |
| <b>Other Cost, \$</b>      |                     |            |                       |             |
| 12-month pre               | \$1,756             | (\$1,447)  | \$19,933              | (\$37,857)  |
| 12-month post              | \$6,391             | (\$12,559) | \$13,705              | (\$28,537)  |

**eFigure. Mean Expenditures, Before and After Intervention, by 6-Month Increments, Showing Parallel Trends**

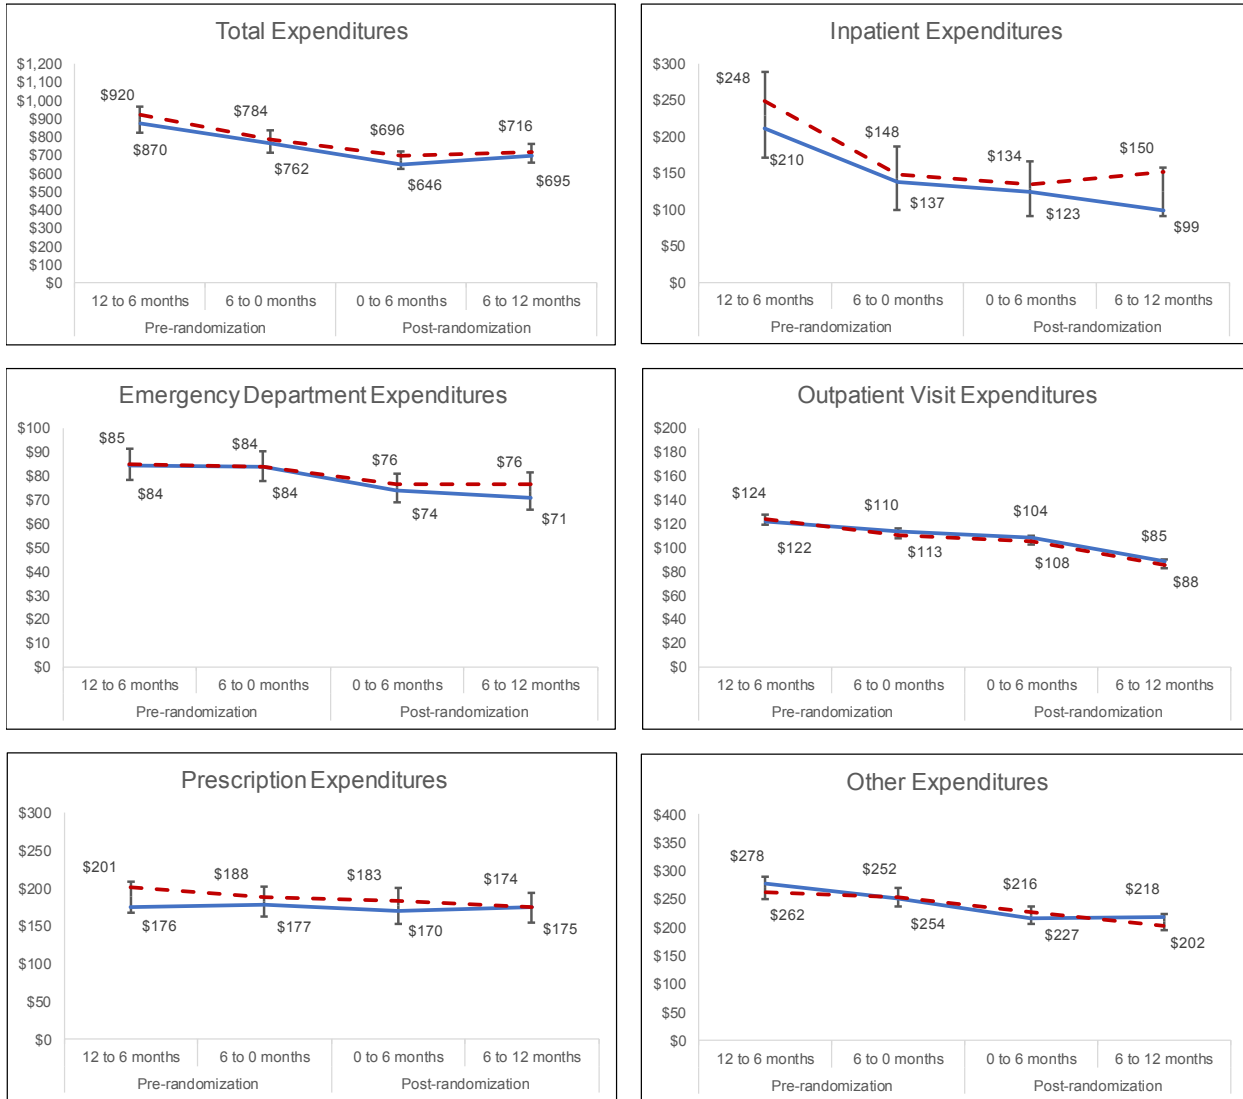

— CHECK  
- - - Usual care  
 95% confidence interval
